# Supplementary material for: Biomineralized matrix-assisted osteogenic differentiation of human embryonic stem cells
Source: Royal Society of Chemistry journal article supplement (doi:10.1039/c4tb00714j), 2014-07-04
Supplement: c4tb00714j1.pdf [file c4tb00714j1.pdf]

## Supplementary Information

### **Biomaterialized matrix-assisted osteogenic differentiation of human embryonic stem cells**

Heemin Kang <sup>ab</sup>, Cai Wen <sup>ac</sup>, Yongsung Hwang <sup>a</sup>, Yu-Ru V. Shih <sup>a</sup>, Mrityunjay Kar <sup>a</sup>,  
Sung Wook Seo <sup>ad</sup>, and Shyni Varghese <sup>\*ab</sup>

<sup>a</sup> *Department of Bioengineering and <sup>b</sup> Materials Science and Engineering Program, University of California, San Diego, La Jolla, CA 92093, USA.*

<sup>c</sup> *School of Chemistry and Chemical Engineering, Southeast University, Nanjing 210018, China.*

<sup>d</sup> *Department of Orthopaedic Surgery, Sungkyunkwan University School of Medicine, Seoul 135-710, Korea.*

\* Corresponding author: Associate Professor, Department of Bioengineering, University of California, San Diego, 9500 Gilman Drive, Mail Code 0412, La Jolla, CA 92093-0412, USA. Tel.: +1 858 822 7920; Fax: +1 858 534 5722. *E-mail address:* svarghese@ucsd.edu (S. Varghese).

### **Supplementary Figure Legends**

**Supplementary Figure S1.** Characterization of mineralized hydrogels and the effect of different substrates on the pluripotency of hESCs. Release of (a)  $\text{Ca}^{2+}$  and (b)  $\text{PO}_4^{3-}$  from matrigel-coated or non-coated mineralized hydrogels incubated at 37 °C in  $\text{Ca}^{2+}$  and  $\text{PO}_4^{3-}$ -free Tris-HCl buffer as a function of time. Data are presented as mean  $\pm$  standard deviations (n=3). (c) NANOG gene expression of HUES9 cells cultured in growth medium on non-mineralized (NM) and mineralized (M) hydrogels and coverslips (CS) as a function of culture time. Data are presented as mean  $\pm$  standard errors (n=3). Two-way ANOVA with Bonferroni post-hoc test was used to compare multiple groups in different time points. Asterisks indicate statistical significances according to p-values (\*\*\*:  $p < 0.001$ ).

**Supplementary Figure S2.** Characterization of mineralized macroporous hydrogels and their effect on hESCs. (a) Bright field images of non-mineralized (NM) and mineralized (M) macroporous hydrogels in their swollen state. Scale bars represent 200  $\mu\text{m}$ . (b)  $\text{Ca}^{2+}$  and (c)  $\text{PO}_4^{3-}$  release from M macroporous hydrogels in Tris-HCl buffer at 37 °C for 7 days. Data are presented as mean  $\pm$  standard deviations (n=3). (d) Representative live-dead image of hESC-laden matrix (HUES9-laden macroporous hydrogels) after 3 days of culture. Scale bars indicate 200  $\mu\text{m}$ . DNA contents of (e) HUES9-laden and (f) H9-laden macroporous hydrogels as a function of culture time. Data are presented as mean  $\pm$  standard errors (n=3).

**Supplementary Figure S3.** Pluripotency of hESCs prior to their culture on various substrates. Representative immunofluorescent staining image of hESCs (HUES9 cells) for NANOG (green) and OCT4 (green) with corresponding nucleus (Hoechst; blue) confirming their pluripotency. Scale bars represent 200  $\mu\text{m}$ .

**Supplementary Figure S4.** Adhesion and proliferation of hESCs on the matrices in 2-D culture. (a) Bright-field images of HUES9 after 1, 3, and 7 days of culture on non-mineralized (NM) and mineralized (M) matrices and coverslips (CS). Scale bars represent 500  $\mu\text{m}$ . (b) Fluorescent staining for F-actin (green) and nucleus (Hoechst; blue) of

HUES9 cells after 3 days of culture on NM and M hydrogels and CS. Scale bars indicate 100  $\mu$ m. Circularity index of the cells (bar graph) on various matrices was determined from F-actin images. Data are presented as mean  $\pm$  standard errors (n=30 cells).

**Supplementary Figure S5.** Fluorescent staining for osteocalcin (green) and nucleus (Hoechst; blue; inset) of HUES9 cells after 14, 21, and 28 days of 2-D culture on non-mineralized (NM) and mineralized (M) hydrogels and coverslips (CS). Scale bars represent 100  $\mu$ m.

**Supplementary Figure S6.** Fluorescent staining for F-actin (red) after 14, 21, and 28 days of 2-D culture for HUES9 cells on non-mineralized (NM) and mineralized (M) matrices and coverslips (CS). Scale bars represent 100  $\mu$ m.

**Supplementary Figure S7.**  $\mu$ CT analyses of non-mineralized (NM) and mineralized (M) matrices prior to *in vivo* implantation confirming that the matrices themselves are not radio-opaque.

**Supplementary Figure S8.**  $\mu$ CT analyses of cell-laden matrices after *in vivo* implantation. 2-D cross-sectional  $\mu$ CT images in coronal, transverse, and sagittal planes of (a) HUES9 or (b) H9-laden non-mineralized (NM) and mineralized (M) matrices at 8 weeks post-implantation. Scale bars represent 2 mm.

**Supplementary Figure S9.** Histochemical analyses of cell-laden matrices post *in vivo* implantation. (a) H&E staining of HUES9-laden and H9-laden non-mineralized (NM) macroporous hydrogels after 8 weeks of implantation. Scale bars indicate 500  $\mu$ m. High magnification images of the peripheral mineralized region in the cell-laden matrices are also shown. Yellow arrows indicate bone-like matrix formation. Scale bars represent 100  $\mu$ m. (b) Immunohistochemical staining of HUES9 and H9-laden NM and mineralized (M) macroporous hydrogels for lamin B following 8 weeks of implantation. Mouse skin tissue was used as a negative control. Scale bars indicate 100  $\mu$ m.

**Supplementary Table S1.** List of primers used in qRT-PCR experiments.

**Supplementary Video S1.** 3-D  $\mu$ CT views demonstrate uniform and pronounced mineralization in HUES9-laden mineralized matrices after 4 and 8 weeks of implantation.

**Supplementary Video S2.** 3-D  $\mu$ CT views demonstrate uniform and pronounced mineralization in H9-laden mineralized matrices after 4 and 8 weeks of implantation.

## Supplementary Figure S1

**a**

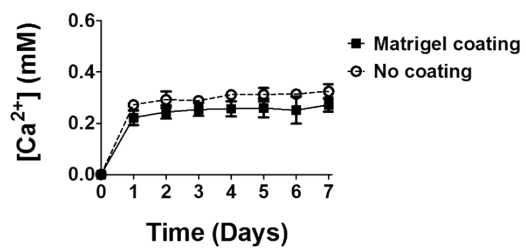

**b**

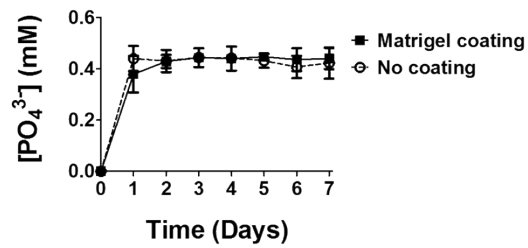

**c**

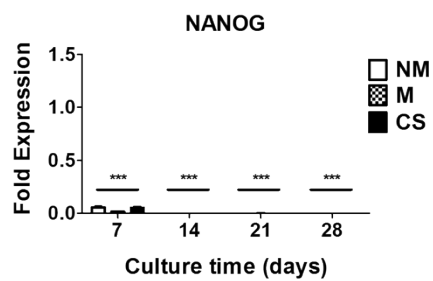

## Supplementary Figure S2

**a**

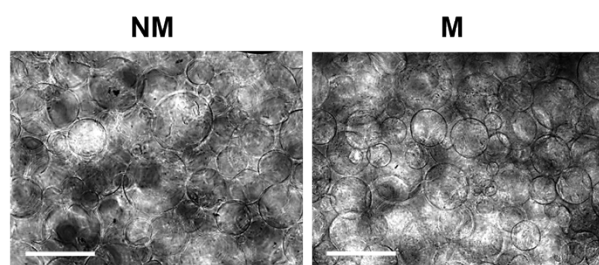

**b**

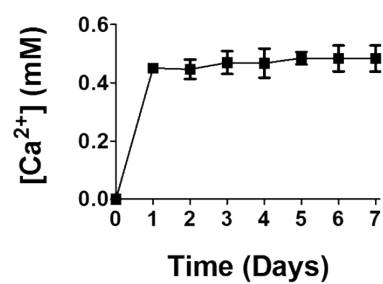

**c**

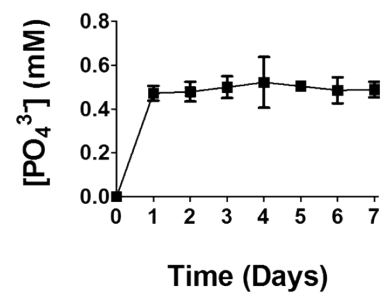

**d**

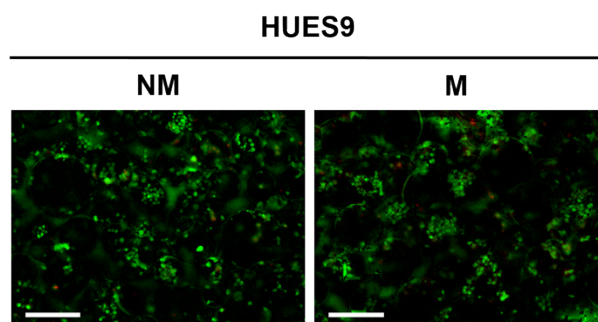

**e**

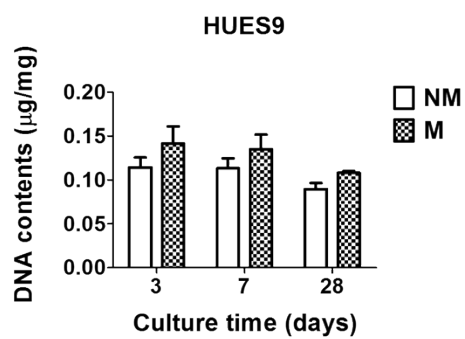

**f**

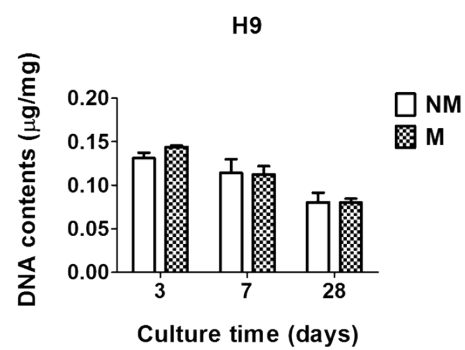

**Supplementary Figure S3**

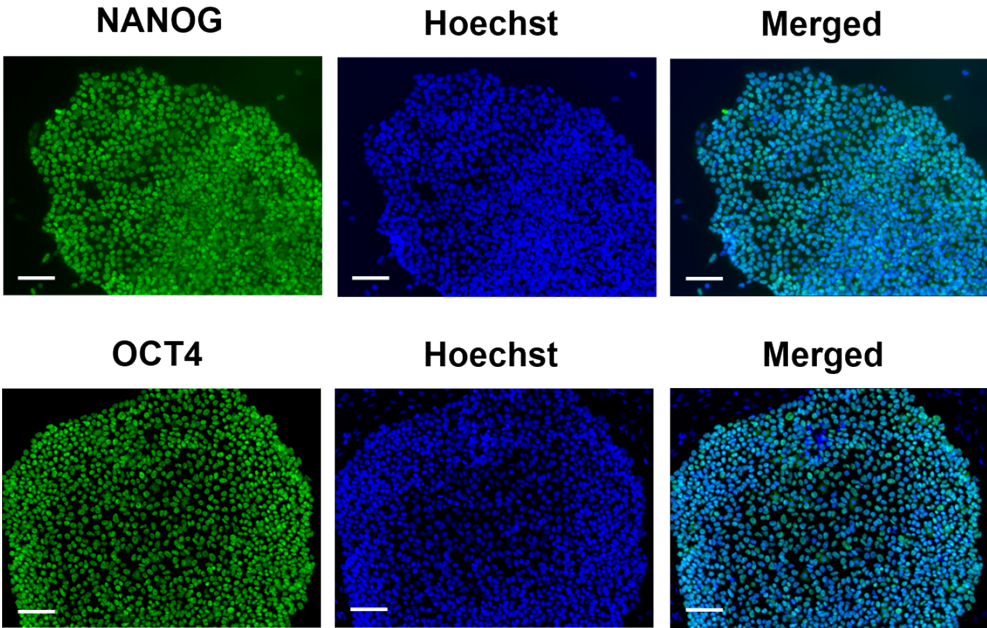

# Supplementary Figure S4

**a**

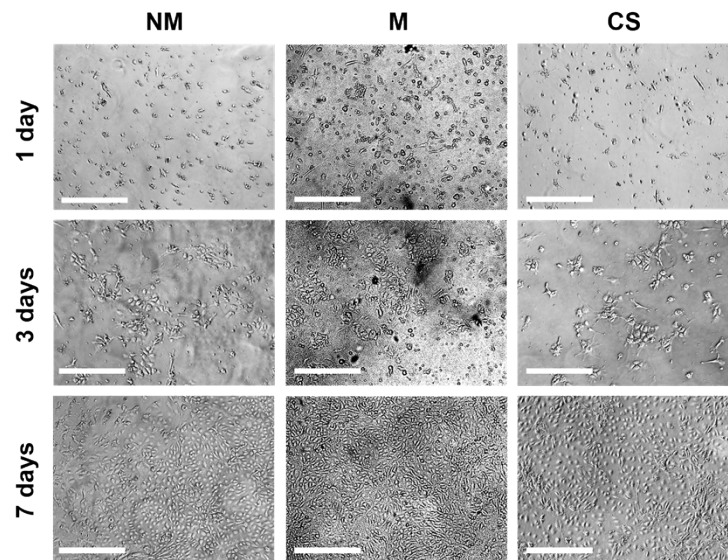

**b**

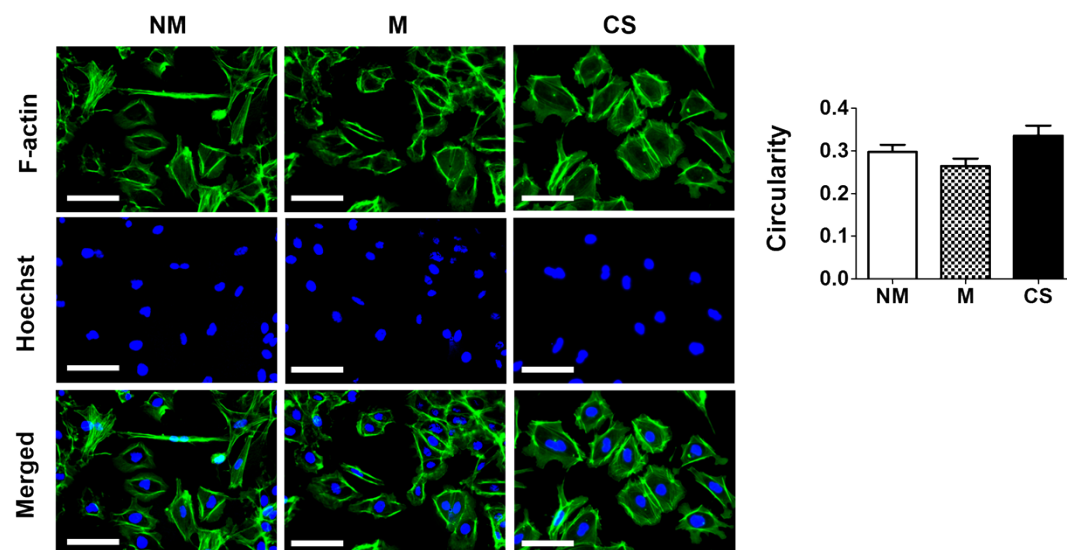



Supplementary Figure S5

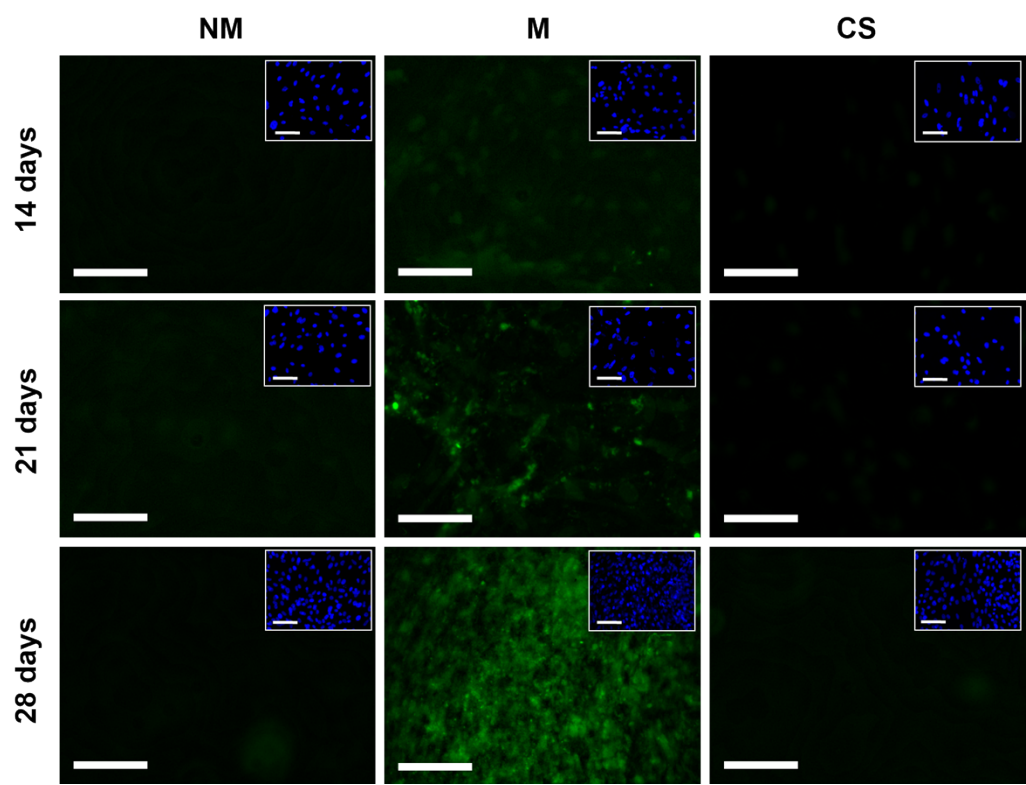

Supplementary Figure S6

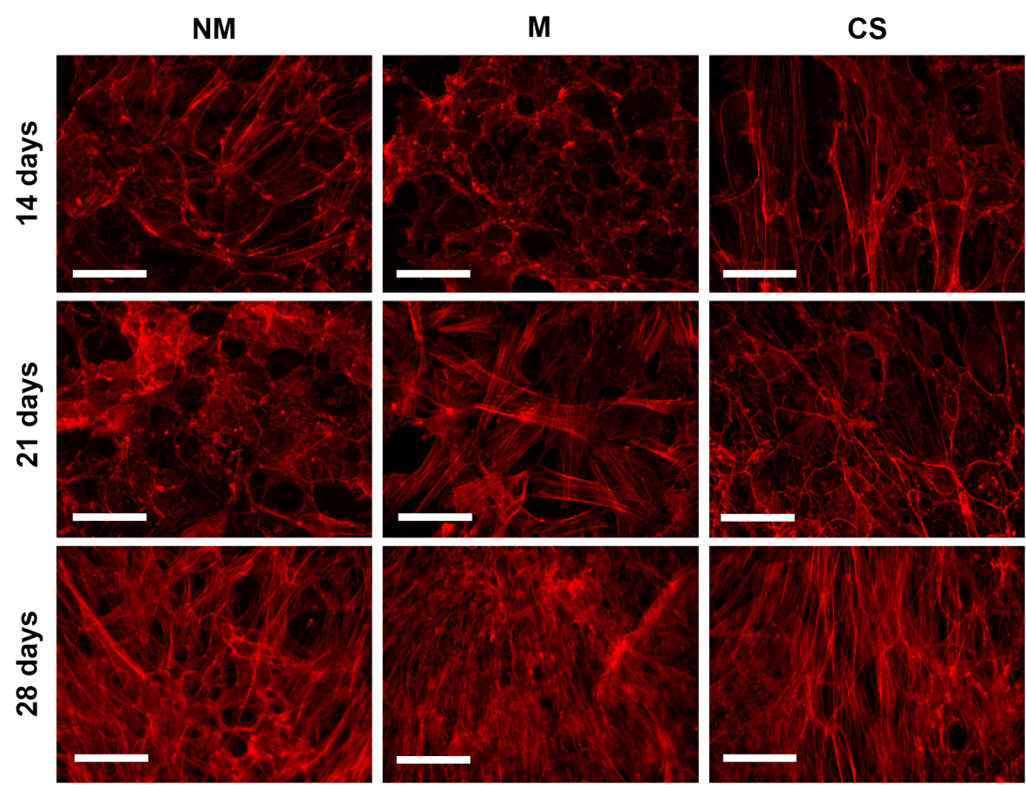

Supplementary Figure S7

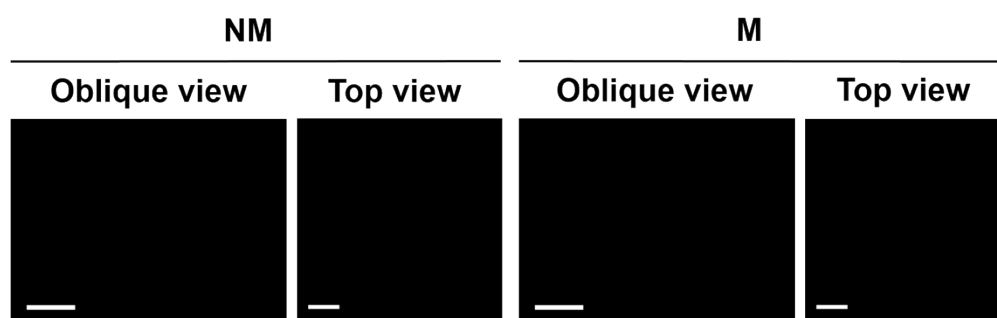

Supplementary Figure S8

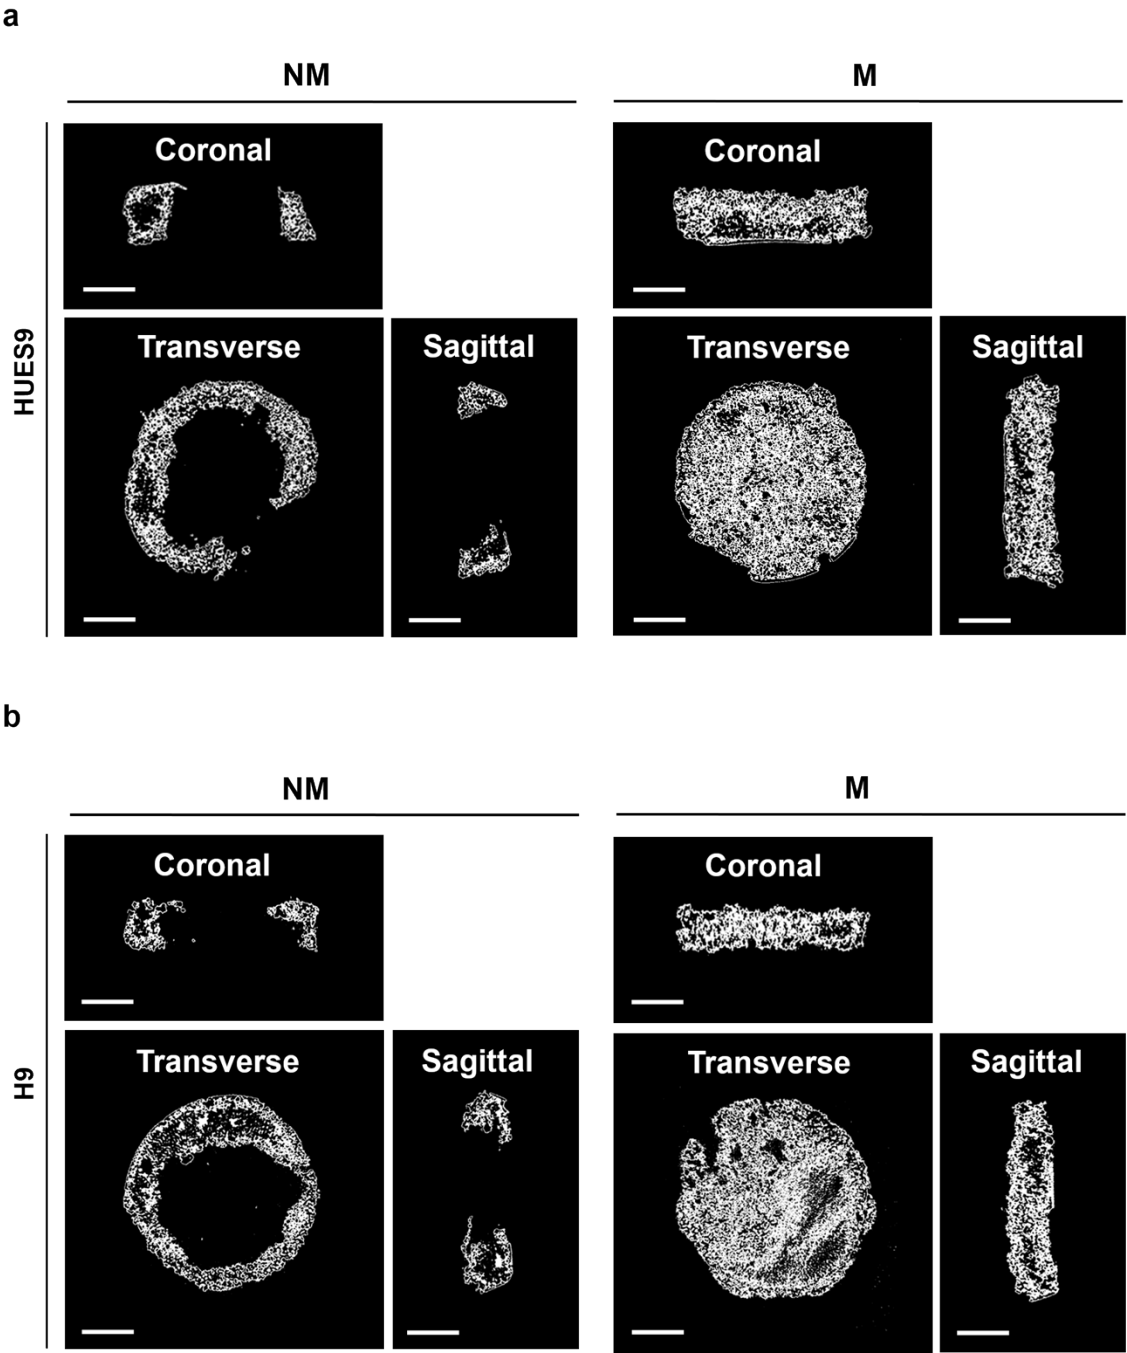

Supplementary Figure S9

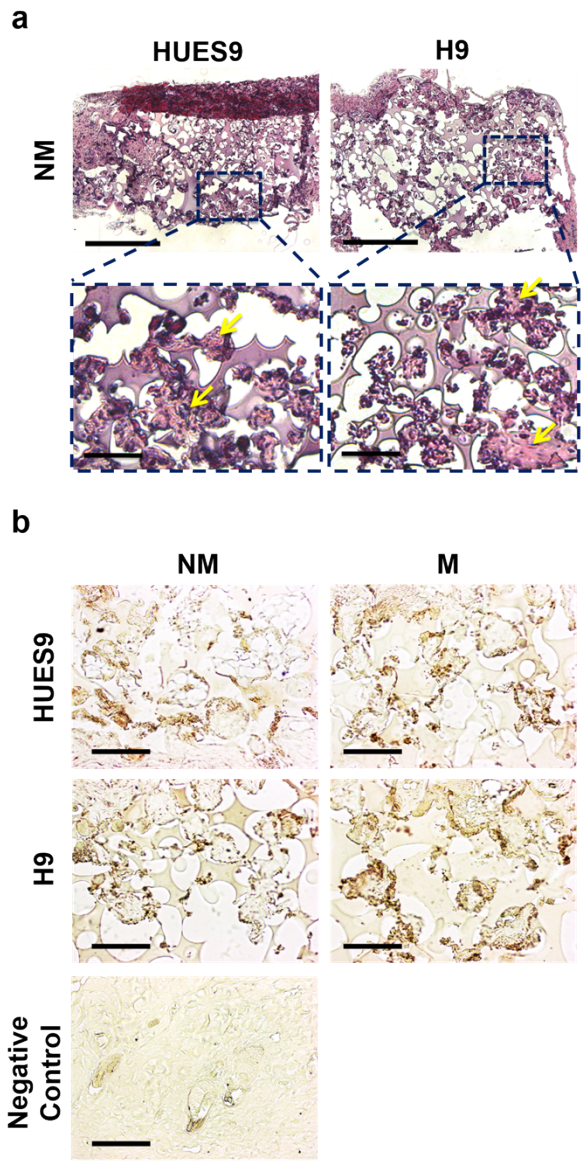

**Supplementary Table S1**

| Gene                                     | Gene (Abbreviation) | Direction | Primer Sequence                       |
|------------------------------------------|---------------------|-----------|---------------------------------------|
| Glyceraldehyde 3-phosphate dehydrogenase | GAPDH               | Forward   | 5' CAT CAA GAA GGT GGT GAA GC 3'      |
|                                          |                     | Reverse   | 5' GTT GTC ATA CCA GGA AAT GAG C 3'   |
| Runt-related Transcription Factor 2      | RUNX2               | Forward   | 5' CCA CCC GGC CGA ACT GGT CC 3'      |
|                                          |                     | Reverse   | 5' CCT CGT CCG CTC CGG CCC ACA 3'     |
| Osteocalcin                              | OCN                 | Forward   | 5' GAA GCC CAG CGG TGC A 3'           |
|                                          |                     | Reverse   | 5' CAC TAC CTC GCT GCC CTC C 3'       |
| Secreted phosphoprotein 1                | SPP1                | Forward   | 5' AAT TGC AGT GAT TTG CTT TTG C 3'   |
|                                          |                     | Reverse   | 5' CAG AAC TTC CAG AAT CAG CCT GTT 3' |
| NANOG                                    | NANOG               | Forward   | 5' GAT TTG TGG GCC TGA AGA AA 3'      |
|                                          |                     | Reverse   | 5' ATG GAG GAG GGA AGA GGA GA 3'      |
